# Supplementary material for: Halogen activation and radical cycling initiated by imidazole-2-carboxaldehyde photochemistry
Source: Copernicus journal article supplement (doi:10.5194/acp-19-10817-2019), 2019-08-27
Supplement: Supplementary file 1 [file acp-19-10817-2019-supplement.zip]

Archive with 6 entries (6 files):
- script_bromide.m
- bromCalc.m
- Supporting_Information.pdf
- script_iodide.m
- iodCalc.m
- acp-19-10817-2019-supplement-title-page.pdf
