# Supplementary material for: Halogen activation and radical cycling initiated by imidazole-2-carboxaldehyde photochemistry
Source: Copernicus journal article supplement (doi:10.5194/acp-19-10817-2019), 2019-08-27
Supplement: Supplementary file 1 [file acp-19-10817-2019-supplement.zip › acp-19-10817-2019-supplement-title-page.pdf]

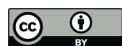

*Supplement of*

## **Halogen activation and radical cycling initiated by imidazole-2-carboxaldehyde photochemistry**

**Pablo Corral Arroyo et al.**

*Correspondence to:* Markus Ammann ([markus.ammann@psi.ch](mailto:markus.ammann@psi.ch))

- [acp-19-10817-2019-supplement-title-page.pdf](#)
- [Supporting\\_Information.pdf](#)
- [bromCalc.m](#)
- [iodCalc.m](#)
- [script\\_bromide.m](#)
- [script\\_iodide.m](#)

The copyright of individual parts of the supplement might differ from the CC BY 4.0 License.
