# Supplementary material for: Halogen activation and radical cycling initiated by imidazole-2-carboxaldehyde photochemistry
Source: Copernicus journal article supplement (doi:10.5194/acp-19-10817-2019), 2019-08-27
Supplement: Supplementary file 1 [file acp-19-10817-2019-supplement.zip › iodCalc.m]

function F = iodCalc(x,keff,i,ich,o2,ic3,diff1,diff2)

% x=abs(x);

k_iIC3=keff(1);
k4=keff(2);
k_IC=keff(3);
k_IC3ca=keff(4);
k_iho2=keff(5);
k_Dho2=keff(6);
k_ho2ho2=keff(7);
k_rlx=keff(8);
k_IC3o2=keff(9);
k_phot_h2o2=keff(10);
k5=keff(11);
k6=keff(12);
k7=keff(13);
k8=keff(14);
k9=keff(15);
k10=keff(16);
k11=keff(17);

F(1) = k4*ich*o2-k_iho2.*i*x(1)-2*k_ho2ho2*x(1)^2-2*k6*x(1)*x(3)-k7*x(1)*x(2)-k8*x(1)*x(4)-diff1*x(1);
F(2) = k_iIC3*i*ic3-k9*x(2)*i-k7*x(1)*x(2)+k8*x(1)*x(4)-2*k10*x(2)^2+2*0.01*x(4);
F(3) = k10*x(2)^2+k6*x(3)*x(1)+k11*x(3)*x(2)-k8*x(1)*x(4)-diff2*x(4)/(768*i+1)-0.01*x(4);
F(4) = k9*x(2)*i-k11*x(3)*x(2)-2*k6*x(3)*x(1);

end
